# Supplementary material for: Assessing the Hydrological Impact Sensitivity to Climate Model Weighting Strategies
Source: Copernicus journal article supplement (doi:10.5194/egusphere-2024-1183), 2024-06-05
Supplement: Supplementary file 1 [file egusphere-2024-1183-supplement.pdf]

# Supplement

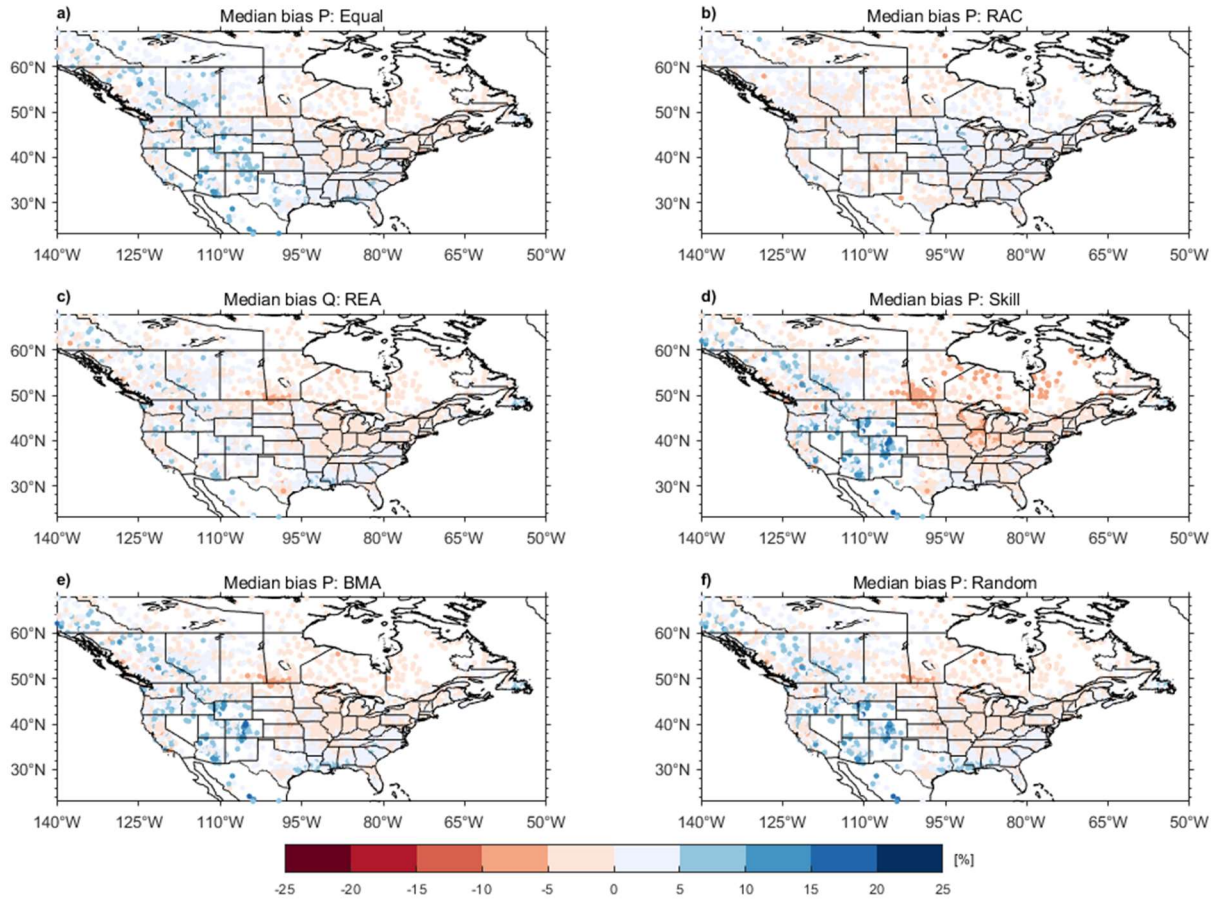

Figure S1: similar to fig 4 but median bias is plotted.

845

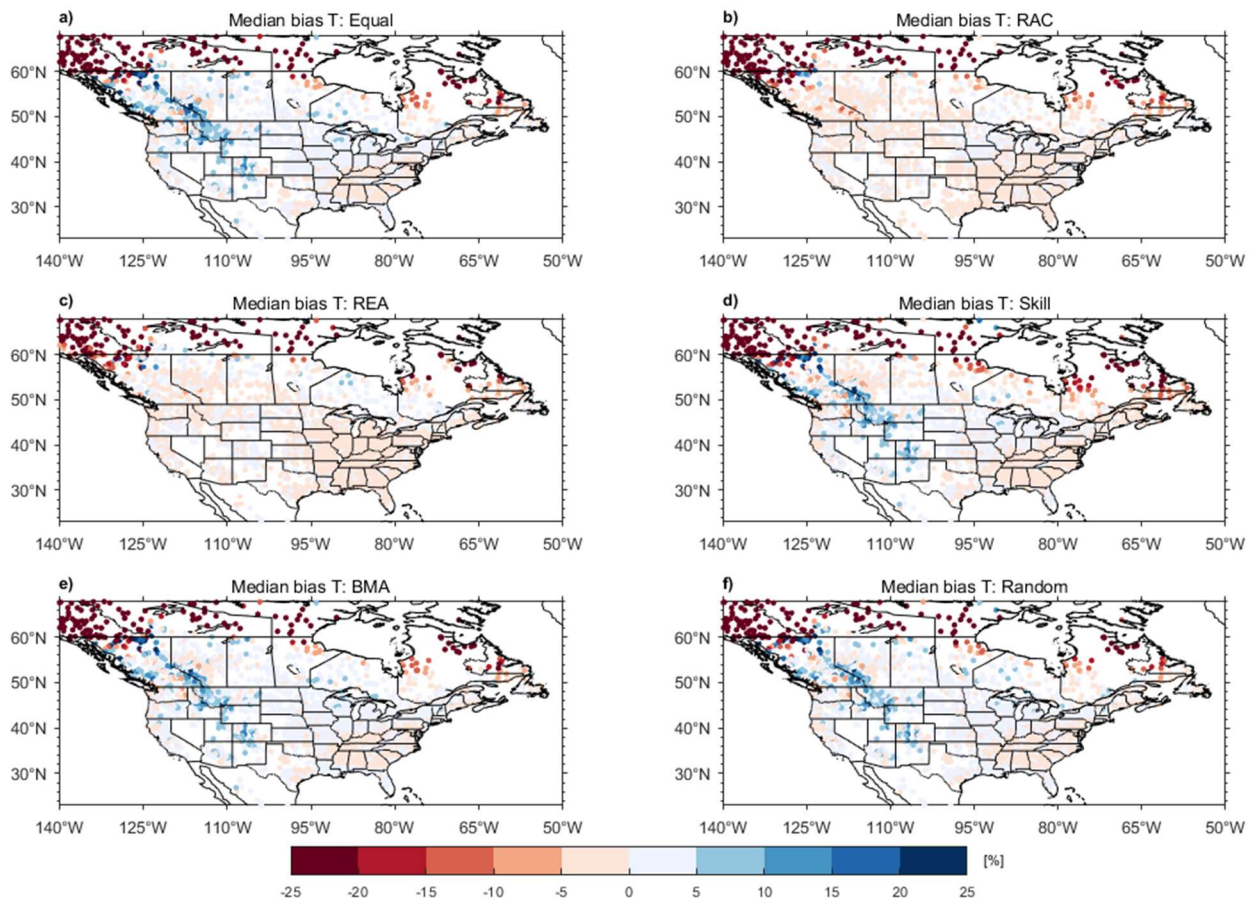

850 Figure S2. Similar to Figure 5, but bias is plotted as negative and positive values

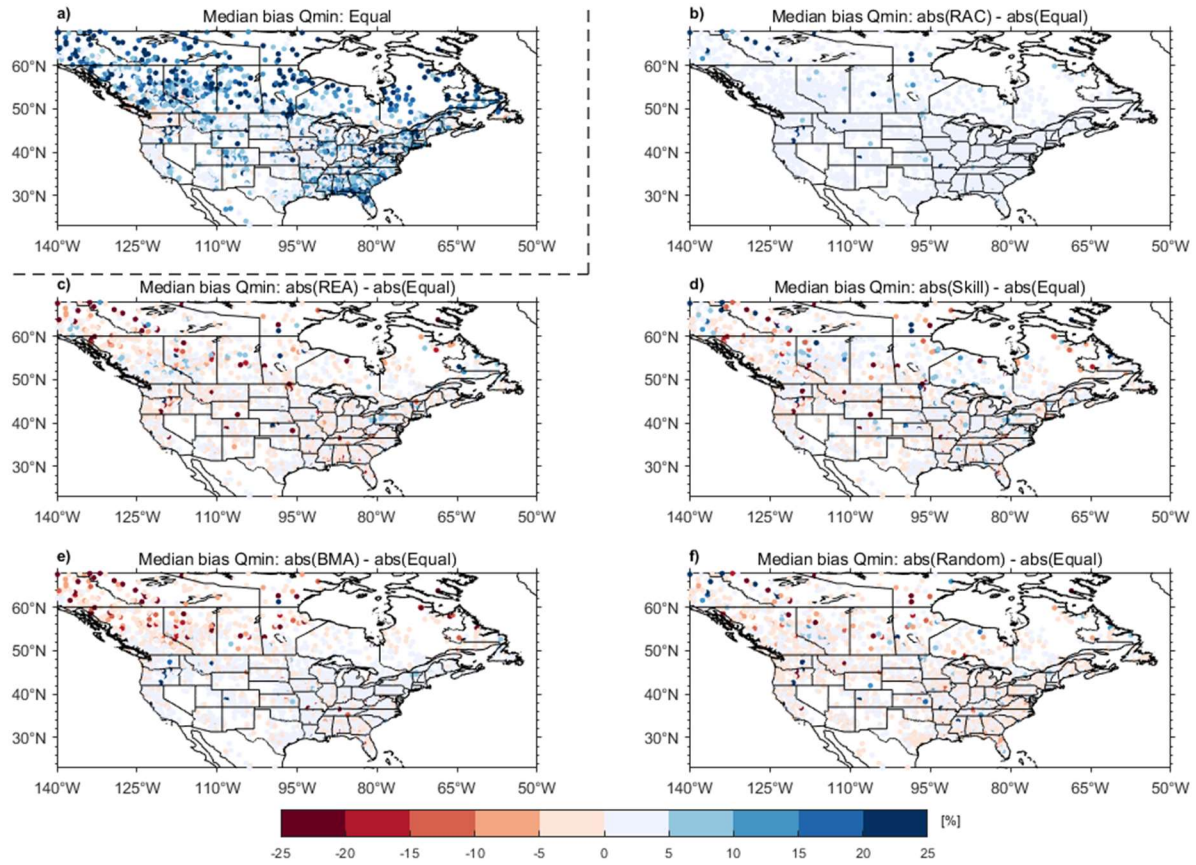

Figure S3. Similar to figure 6 but for minimum streamflow ( $Q_{min}$ ).

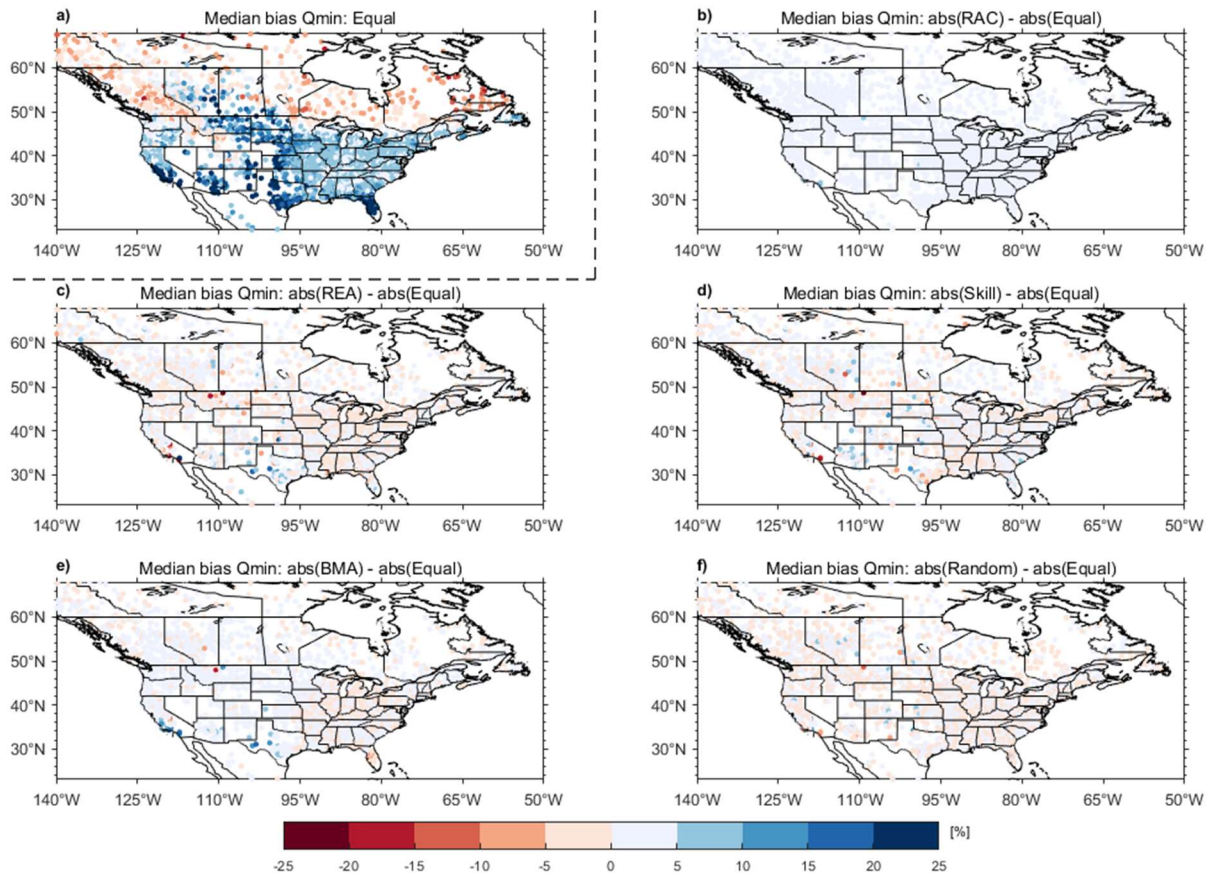

Figure S4. Similar to figure 6 but for maximum streamflow (Qmax).

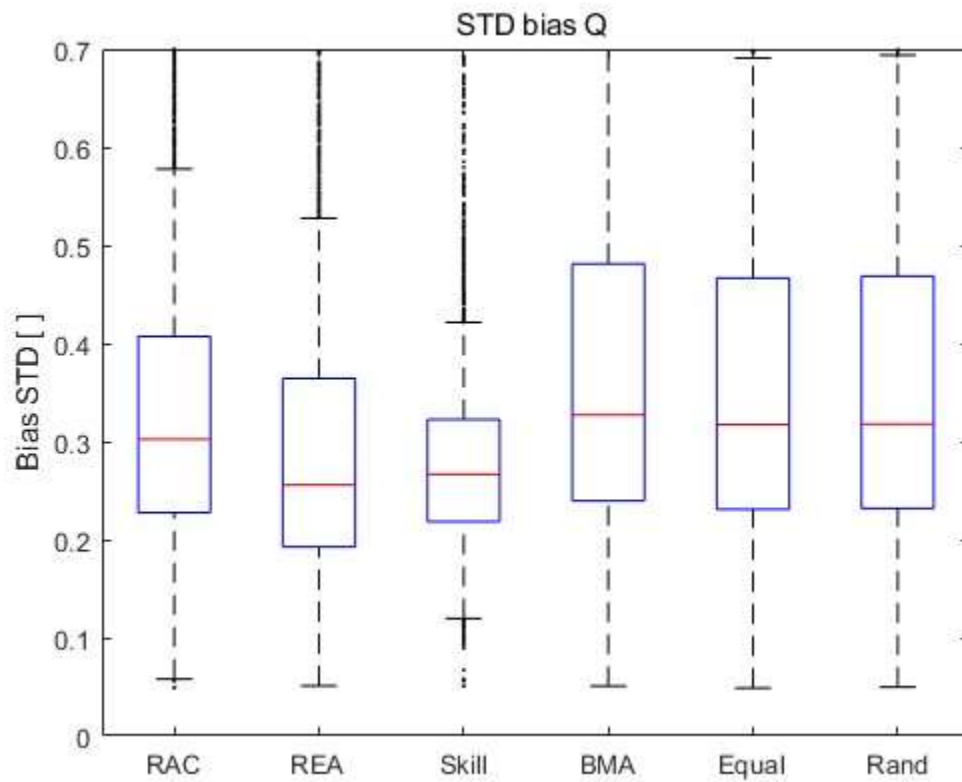

865 **Figure S5. Standard deviation of bias in streamflow weighing done on streamflow (streamflow simulated with raw P and T), no bias correction done. (HM=HMETS)**
